# Supplementary material for: Prognosis of spontaneous pneumomediastinum occurring in dermatomyositis or polymyositis patients with interstitial lung disease according to antimelanoma differentiation-associated gene 5 antibody status: a retrospective cohort study
Source: HighWire-hosted journal article supplement (doi:10.1136/rmdopen-2022-002770), 2023-02-01
Supplement: rmdopen-2022-002770supp001_data_supplement.pdf [file rmdopen-2022-002770supp001_data_supplement.pdf]

## 1 Supplemental Table 1. Characteristics of dead patients

|                                                                   | Dead patients<br>without SPNM (n=7) | Dead patients with<br>SPNM (n=8) | P-value |
|-------------------------------------------------------------------|-------------------------------------|----------------------------------|---------|
| Diagnosis                                                         |                                     |                                  |         |
| Dermatomyositis, n (%)                                            | 2 (28.6)                            | 2 (25.0)                         | 1.000   |
| Polymyositis, n (%)                                               | 3 (42.9)                            | 0 (0)                            | 0.155   |
| CADM, n (%)                                                       | 2 (28.6)                            | 6 (75.0)                         | 0.201   |
| RP-ILD, n (%)                                                     | 2 (28.6)                            | 7 (87.5)                         | 0.073   |
| Age, years, median (IQR)                                          | 71 (67, 72)                         | 59 (56, 65)                      | 0.023   |
| Female, n (%)                                                     | 3 (32.9)                            | 3 (27.5)                         | 2.000   |
| Smoking habits, n (%)                                             | 4 (57.1)                            | 4 (50.0)                         | 1.000   |
| Myositis specific autoantibodies status                           |                                     |                                  |         |
| Anti-MDA5 antibody-positive, n (%)                                | 1 (14.3)                            | 8 (100)                          | 0.004   |
| Anti-ARS antibody-positive, n (%)                                 | 2 (28.6)                            | 0 (0)                            | 0.388   |
| Anti-TIF1- $\gamma$ antibody-positive, n (%)                      | 0 (0)                               | 0 (0)                            | None    |
| Anti-Mi-2 antibody-positive, n (%)                                | 2 (28.6)                            | 0 (0)                            | 0.388   |
| Antibodies-negative ( $\times 1$ ), n (%)                         | 2 (28.6)                            | 0 (0)                            |         |
| Anti-SSA (Ro52) antibody-positive, n (%)                          | 0 (0)                               | 0 (0)                            | None    |
| Treatments                                                        |                                     |                                  |         |
| Maximum prednisolone dose, mg/day,<br>median (IQR) ( $\times 2$ ) | 50 (40, 55)                         | 60 (56, 60)                      | 0.096   |
| Methylprednisolone pulse therapy, n (%)                           | 5 (71.4)                            | 7 (87.5)                         | 0.897   |
| Intravenous cyclophosphamide                                      | 3 (42.9)                            | 7 (87.5)                         | 0.200   |
| Tacrolimus, n (%)                                                 | 3 (42.9)                            | 7 (87.5)                         | 0.200   |
| Cyclosporin, n (%)                                                | 0 (0)                               | 3 (37.5)                         | 0.244   |
| Tofacitinib, n (%)                                                | 0 (0)                               | 6 (75.0)                         | 0.015   |

|                                                 |                      |                       |       |
|-------------------------------------------------|----------------------|-----------------------|-------|
| IVIg, n (%)                                     | 2 (28.6)             | 0 (0)                 | 0.388 |
| Plasma exchange, n (%)                          | 1 (14.3)             | 6 (75.0)              | 0.067 |
| Treatments, types                               |                      |                       |       |
| GC monotherapy, n (%)                           | 2 (28.6)             | 0 (0)                 | 0.388 |
| GC with one immunosuppressant, n (%)            | 2 (28.6)             | 0 (0)                 | 0.388 |
| GC with two immunosuppressants, n (%)           | 3 (42.9)             | 3 (37.5)              | 1.000 |
| GC with three or more immunosuppressants, n (%) | 0 (0)                | 5 (62.5)              | 0.044 |
| Laboratory test result                          |                      |                       |       |
| LDH                                             | 333 (283, 585)       | 392 (325, 449)        | 0.908 |
| CK                                              | 141 (37, 221)        | 72 (54, 97)           | 0.643 |
| KL-6                                            | 1183 (822, 1532)     | 983 (760, 1576)       | 0.817 |
| CRP                                             | 0.40 (0.12, 1.12)    | 0.31 (0.17, 0.55)     | 0.727 |
| ferritin                                        | 343.0 (243.3, 746.5) | 902.7 (456.3, 1411.7) | 0.121 |
| Use of a ventilator, n (%)                      | 3 (42.9)             | 6 (75)                | 0.460 |
| Cause of death                                  |                      |                       |       |
| ILD worsening, n (%)                            | 4 (57.1)             | 6 (75)                |       |
| Cancer, n (%)                                   | 3 (42.9)             | 1 (12.5)              |       |
| Tension pneumothorax, n (%)                     | 0                    | 1 (12.5)              |       |

1 SPNM: spontaneous pneumomediastinum, CADM: clinically amyopathic  
2 dermatomyositis, RP-ILD: rapidly progressive interstitial lung disease, IVIg: intravenous  
3 immunoglobulin, LDH: lactate dehydrogenase, CK: creatine kinase, KL-6: Krebs von  
4 Lungren-6, CRP: C-reactive protein, ILD: interstitial lung disease  
5 ※1 "Antibodies-negative" means that anti-MDA5, ARS, TIF1- $\gamma$ , and Mi-2 antibodies  
6 were negative. Data regarding other myositis-specific antibodies was not collected in this  
7 study, because only anti-MDA5, ARS, TIF1- $\gamma$ , and Mi-2 antibodies were approved tests  
8 in a daily practice setting in Japan.  
9 ※2 Maximum prednisolone dose means the highest amount of prednisolone dose or  
10 equivalent after excluding glucocorticoids dose of methylprednisolone pulse therapy.

1    **Supplemental Table 2. Hazard ratio of SPNM occurrence for death adjusted by age**  
2    **and rapidly progressive interstitial lung disease (RP-ILD)**

|                 | Hazard ratio (95% confidential interval) | P-value |
|-----------------|------------------------------------------|---------|
| SPNM occurrence | 3.13 (1.03 - 9.52)                       | 0.044   |
| RP-ILD          | 10.94 (3.03 - 39.47)                     | < 0.001 |
| Age             | 1.09 (1.02 - 1.16)                       | 0.010   |

3

4

1 **Supplemental Table 3. Characteristics of anti-MDA5 antibody-positive patients and**  
 2 **anti-ARS antibody-positive patients**

|                                                     | Anti-ARS<br>antibody positive<br>(n = 53) | Anti-MDA5<br>antibody positive<br>(n = 40) | P-value |
|-----------------------------------------------------|-------------------------------------------|--------------------------------------------|---------|
| Diagnosis                                           |                                           |                                            |         |
| Dermatomyositis, n (%)                              | 23 (43.4)                                 | 7 (17.5)                                   | 0.015   |
| Polymyositis, n (%)                                 | 10 (18.9)                                 | 0 (0)                                      | 0.010   |
| CADM, n (%)                                         | 20 (37.7)                                 | 33 (82.5)                                  | < 0.001 |
| RP-ILD, n (%)                                       | 3 (5.7)                                   | 19 (47.5)                                  | < 0.001 |
| SPNM occurrence, n (%)                              | 6 (11.3)                                  | 15 (37.5)                                  | 0.006   |
| Age, years, median (IQR)                            | 66 (53, 70)                               | 58 (48, 65)                                | 0.014   |
| Female, n (%)                                       | 26 (49.1)                                 | 21 (52.5)                                  | 0.905   |
| Smoking habits, n (%)                               | 25 (47.2)                                 | 16 (40.0)                                  | 0.632   |
| Treatments                                          |                                           |                                            |         |
| Maximum prednisolone dose, mg/day,<br>mean $\pm$ SD | 40 (40, 50)                               | 50 (50, 60)                                | < 0.001 |
| Methylprednisolone pulse therapy, n (%)             | 3 (5.7)                                   | 22 (55.0)                                  | < 0.001 |
| Intravenous cyclophosphamide, n (%)                 | 18 (34.0)                                 | 37 (92.5)                                  | < 0.001 |
| Tacrolimus, n (%)                                   | 34 (64.2)                                 | 37 (92.5)                                  | 0.003   |
| Cyclosporin, n (%)                                  | 6 (11.3)                                  | 7 (17.5)                                   | 0.583   |
| Tofacitinib, n (%)                                  | 1 (1.9)                                   | 10 (25.0)                                  | 0.002   |

|                                                 |                      |                       |         |
|-------------------------------------------------|----------------------|-----------------------|---------|
| IVIg, n (%)                                     | 2 (3.8)              | 2 (5.0)               | 1.000   |
| Plasma exchange, n (%)                          | 0 (0)                | 10 (25.0)             | < 0.001 |
| Treatments, types                               |                      |                       |         |
| GC monotherapy, n (%)                           | 8 (15.1)             | 0 (0)                 | < 0.001 |
| GC with one immunosuppressant, n (%)            | 32 (60.4)            | 2 (5.0)               | < 0.001 |
| GC with two immunosuppressants, n (%)           | 12 (22.6)            | 27 (67.5)             | < 0.001 |
| GC with three or more immunosuppressants, n (%) | 1 (1.9)              | 11 (27.5)             | 0.001   |
| Laboratory test result                          |                      |                       |         |
| LDH, median (IQR)                               | 314 (254, 467)       | 340 (259, 412)        | 0.978   |
| CK, median (IQR)                                | 218 (93, 1093)       | 92 (58, 198)          | 0.002   |
| KL-6, median (IQR)                              | 782 (560, 1429)      | 890 (558, 1348)       | 0.994   |
| CRP, median (IQR)                               | 0.43 (0.23, 2.00)    | 0.43 (0.37, 1.51)     | 0.989   |
| ferritin, median (IQR)                          | 259.35 (88.4, 764.3) | 572.51 (318.8, 868.9) | 0.009   |
| Use of a ventilator, n (%)                      | 2 (3.8)              | 7 (17.5)              | 0.063   |
| Death within one year, n (%)                    | 2 (3.8)              | 9 (22.5)              | 0.015   |

---

1 CADM: clinically amyopathic dermatomyositis, SPNM: spontaneous  
2 pneumomediastinum, RP-ILD: rapidly progressive interstitial lung disease, IVIg:  
3 intravenous immunoglobulin, GC: glucocorticoids, LDH: lactate dehydrogenase, CK:  
4 creatine kinase, KL-6: Krebs von Lungren-6, CRP: C-reactive protein, ILD: interstitial  
5 lung disease
